# Supplementary material for: Regulation of glycolysis and the Warburg effect in wound healing
Source: JCI Insight. 2020 Sep 3;5(17):e138949. doi: 10.1172/jci.insight.138949 (PMC7526439; doi:10.1172/jci.insight.138949)
Supplement: Supplemental data [file jciinsight-5-138949-s260.pdf]

| Patient Characteristics    | Burn Patients | Keloid Patients | P*             |
|----------------------------|---------------|-----------------|----------------|
| No. of Patients            | 32            | 10              |                |
| Demographics               |               |                 |                |
| Age, years, mean $\pm$ SEM | 50 $\pm$ 3    | 32 $\pm$ 4      | <b>0.0017*</b> |
| Male, no. (%)              | 23 (71%)      | 6 (60%)         | 0.4783         |
| Injury characteristics     |               |                 |                |
| TBSA, %, mean $\pm$ SEM    | 39 $\pm$ 4    | 43 $\pm$ 11     | 0.7151         |
| Inhalation injury, no. (%) | 12 (37%)      | 6 (60%)         | 0.1844         |
| Etiology                   |               |                 |                |
| Flame, no. (%)             | 22 (68%)      | 5 (50%)         | 0.2801         |
| Scald, no. (%)             | 9 (28%)       | 3 (30%)         | 0.9088         |
| Electrical, no. (%)        | 1 (4%)        | 1 (10%)         | 0.3729         |
| Other, no. (%)             | 0 (0%)        | 1 (10%)         | 0.2381         |

\*significant differences between burn and keloid groups (p<0.05)

Figure S1 Statistical comparison of burn and keloid patient characteristics.

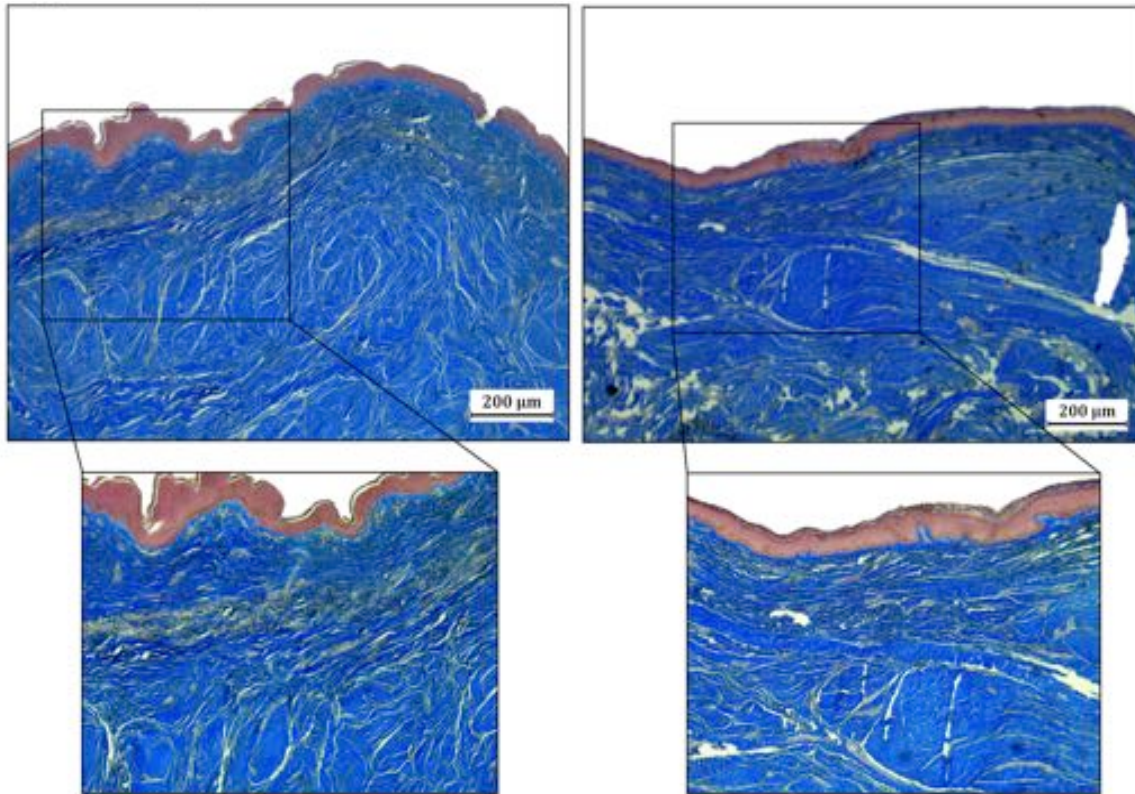

Figure S2 Trichrome staining in post-burn keloid tissue indicates thicker, disorganized collagen fibers.

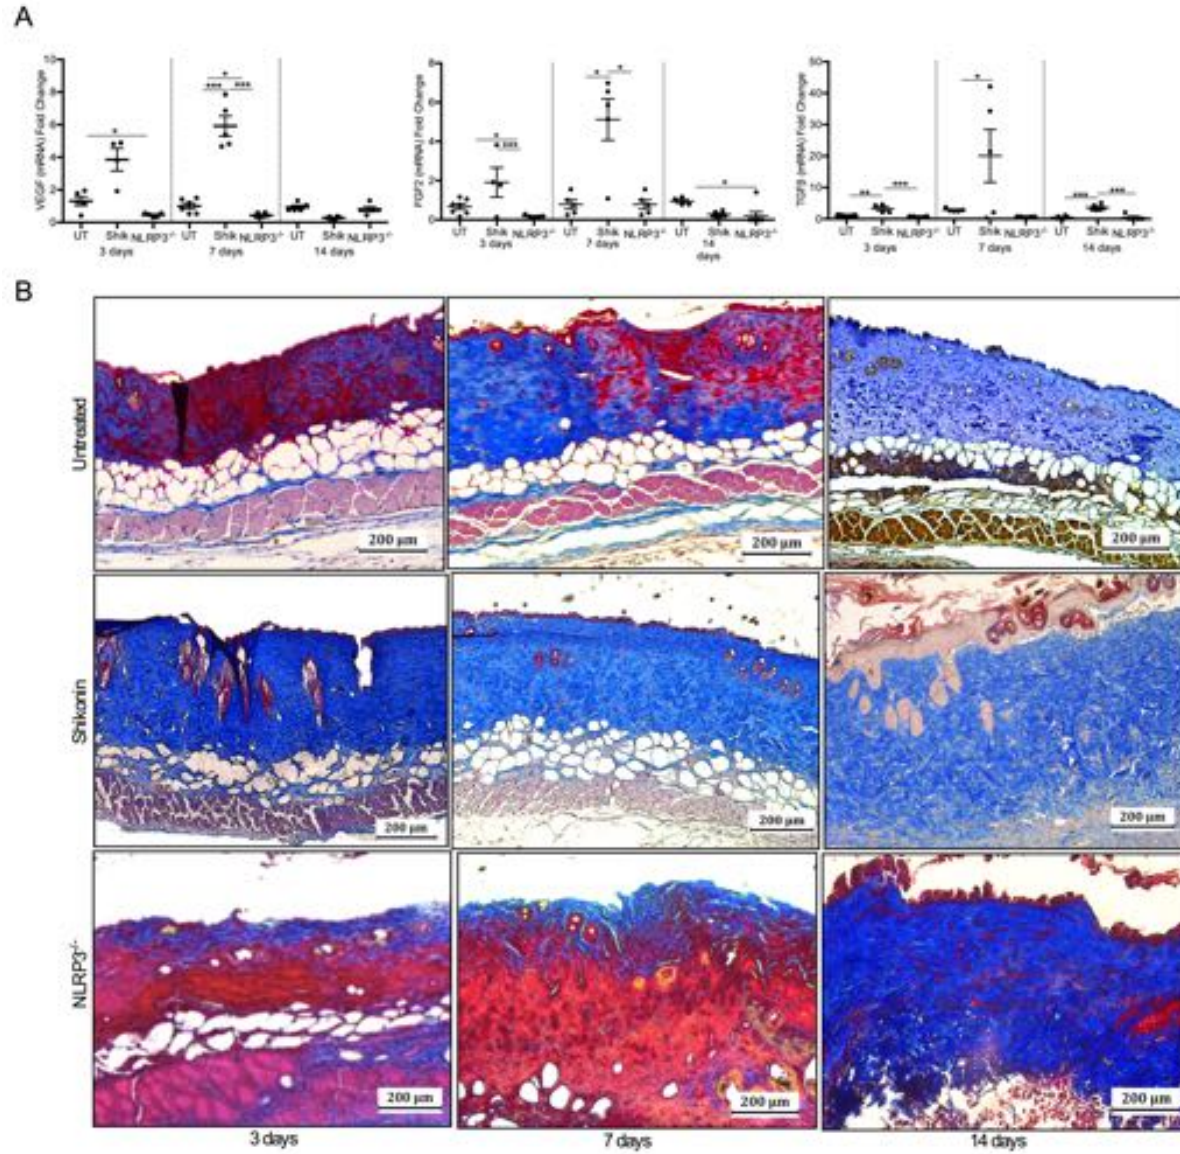

Figure S3 Growth factor gene expression and trichrome staining in murine skin for shikonin versus untreated and NLRP3<sup>-/-</sup>.
